# Supplementary material for: Sensitivity enhancement of inorganic arsenic analysis byin situmicroplasma preconcentration coupled with liquid chromatography atomic fluorescence spectrometry
Source: Royal Society of Chemistry journal article supplement (doi:10.1039/d0ja00222d), 2020-01-01
Supplement: d0ja00222d1.pdf [file d0ja00222d1.pdf]

**Electronic supplementary information for**

**Sensitivity enhancement of inorganic arsenic analysis by *in situ* microplasma preconcentration coupled with liquid chromatography atomic fluorescence spectrometry**

Zhenzhen Yao,<sup>a,b,‡</sup> Meitong Liu,<sup>a,c,‡</sup> Jixin Liu,<sup>\*a,d</sup> Xuefei Mao,<sup>\*a</sup> Xing Na,<sup>d</sup> Zhihong Ma,<sup>b</sup> Yongzhong Qian<sup>a</sup>

<sup>a</sup>*Institute of Quality Standard and Testing Technology for Agro-products, Chinese Academy of Agricultural Sciences, and Key Laboratory of Agro-food Safety and Quality, Ministry of Agriculture and Rural Affairs, Beijing 100081, China*

<sup>b</sup>*Beijing Research Center for Agricultural Standards and Testing, Agricultural Product Quality and Safety Risk Assessment Laboratory of the Department of Agriculture, Beijing 100097, China*

<sup>c</sup>*College of Chemistry, Jilin University, Changchun 130012, China.*

<sup>d</sup>*Beijing Ability Technology Company, Limited, Beijing 100081, China*

‡These authors contributed equally.

Corresponding authors: Tel: +86-10-82106523, Fax: +86-10-82106523.

E-mail address: ljx2117@gmail.com (J. X. Liu); mxf08@163.com or maoxuefei@caas.cn (X. F. Mao)

**Figure captions**

Figure S-1. Chromatogram of arsenic speciation measured in one real rice sample .

**Table titles**

Table S-1. Instrumental conditions of LC-ICP-MS.

## Supporting data

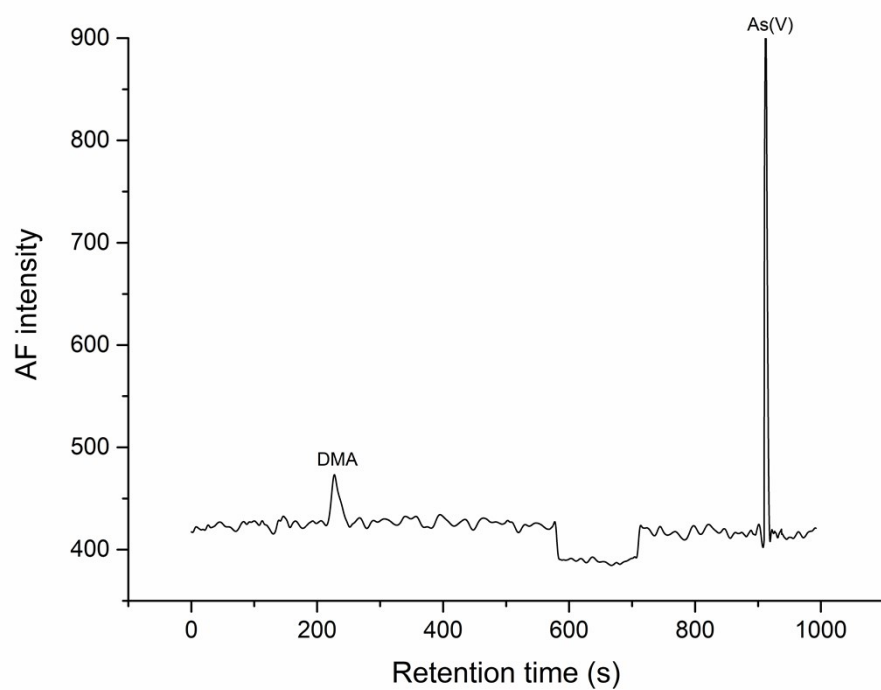

Figure S-1. Chromatogram of arsenic speciation measured in one real rice sample (GBW(E)100348).

**Table S-1. Instrumental conditions of LC-ICP-MS .**

| ICP-MS                     | Parameters                                                          |
|----------------------------|---------------------------------------------------------------------|
| Incident RF power          | 1380W                                                               |
| Cooling Ar gas flow rate   | 14 L min <sup>-1</sup>                                              |
| Nebulizer Ar gas flow rate | 0.84 L min <sup>-1</sup>                                            |
| Auxiliary Ar gas flow rate | 1.2 L min <sup>-1</sup>                                             |
| Collision He gas flow rate | 5 mL min <sup>-1</sup>                                              |
| PP rate                    | 50 rpm                                                              |
| Isotope                    | <sup>75</sup> As                                                    |
| Internal standard          | Ge                                                                  |
| LC                         | Parameters                                                          |
| Analytical column          | Hamilton PRP-X100 anion-exchange column<br>(250 mm × 4.1 mm, 10 µm) |
| Mobile phase               | 15 mM NH <sub>4</sub> H <sub>2</sub> PO <sub>4</sub> (pH = 6.0)     |
| Injection volume           | 100 µL                                                              |
| Flow rate                  | 1 mL min <sup>-1</sup>                                              |
